# Supplementary material for: Natural 2-Amino-3-Methylhexanoic Acid as Plant Elicitor Inducing Resistance against Temperature Stress and Pathogen Attack
Source: MDPI journal article supplement (doi:10.3390/ijms23105715), 2022-05-20
Supplement: s1 [file s1]

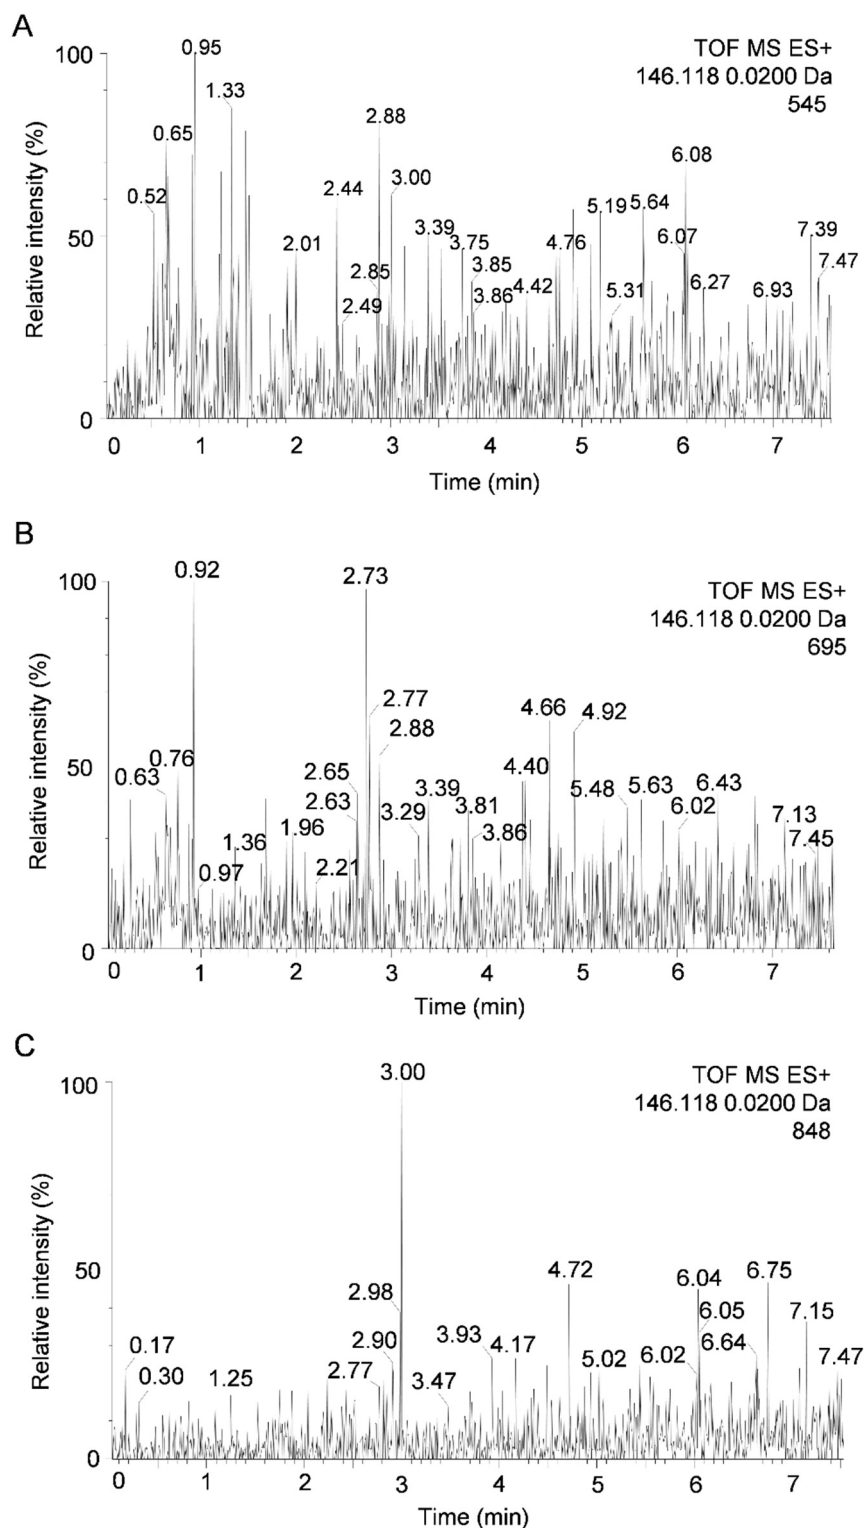

**Figure S1**

Test of AMHA in leaves of three different plants. (A) UPLC-MS chromatograms in positive ion mode of the extracts from 21-day-old leaves of *Arabidopsis* (A), leaves of two-leaf stage seedlings of winter wheat (B) and rice (C). Results represent three independent biological replicates.

**Table S1.**

Effect of AMHA on the growth of different fungal pathogens on PDA medium.

| Fungus species                  | Diameter of colony (mm) |                |              |              |
|---------------------------------|-------------------------|----------------|--------------|--------------|
|                                 | Mock (0)                | 0.5 mM<br>AMHA | 1 mM<br>AMHA | 2 mM<br>AMHA |
| <i>Magnaporthe oryzae</i>       | 64.15±0.89 a            | 62.84±0.38 a   | 63.36±0.48 a | 61.04±0.11 a |
| <i>Rhizoctonia solani</i>       | 68.06±0.36 a            | 68.01±0.45 a   | 67.57±0.48 a | 67.83±0.03 a |
| <i>Fusarium moniliforme</i>     | 65.41±0.22 a            | 63.65±0.51 a   | 63.30±0.39 a | 61.98±0.23 a |
| <i>Fusarium graminearum</i>     | 73.12±0.37 a            | 69.35±0.16 a   | 66.69±0.40 a | 63.62±0.30 b |
| <i>Rhizoctonia cerealis</i>     | 56.46±0.83 a            | 56.23±0.40 a   | 55.62±0.27 a | 51.08±0.81 a |
| <i>Botrytis cinerea</i>         | 68.71±0.13 a            | 69.06±0.39 a   | 68.65±0.31 a | 68.07±0.34 a |
| <i>Sclerotinia sclerotiorum</i> | 62.61±0.38 a            | 63.59±0.40 a   | 64.45±0.34 a | 62.58±0.87 a |
